# Supplementary material
Source: PubMed Central journal article supplement (PMC3763232)
Supplement: Supp_Data.pdf [file Supp_Data.pdf]

## Supplementary Data

SUPPLEMENTARY TABLE S1. PROPOSED SYSTEMATIC NOMENCLATURE FOR THE CYB561 PROTEIN FAMILY

| Species                        | Systematic name | Names used so far                                                 | Protein ID   | References                     |
|--------------------------------|-----------------|-------------------------------------------------------------------|--------------|--------------------------------|
| <i>Arabidopsis thaliana</i>    | At_CYB561B1     | CYBASC1, TCytb, TCB, CLb561A, Acytb <sub>561</sub> -A, b561A.tha5 | Q8L856       | (2), (4), (5), (7), (17), (24) |
| <i>Bos taurus</i>              | At_CYB561B2     | CYBASC2, Acytb <sub>561</sub> -B, b561A.tha4                      | Q9SWS1       | (5), (24)                      |
| <i>Citrus limon</i>            | Bt_CYB561A1     | cytochrome b <sub>561</sub> , Cyt b561, b561Bovine                | P10897       | (9), (19), (21), (23), (24)    |
|                                | Cl_CYB561B1     | CLb561A                                                           | Q3LGX5       | (14)                           |
|                                | Cl_CYB561B2     | CLb561B                                                           | Q3LGX4       | (14)                           |
| <i>Drosophila melanogaster</i> | Dm_CYB561A1     | nemy, b561D.me1                                                   | Q95T77       | (8), (24)                      |
| <i>Homo sapiens</i>            | Hs_CYB561A2     | Cybrd1, Dcytbhuman                                                | Q53TN4       | (10), (11), (15), (24)         |
|                                | Hs_CYB561D1     | CYB561D1                                                          | Q8N8Q1       | (22)                           |
|                                | Hs_CYB561D2     | 101F6, CYB561D2, TSFhuman                                         | O14569       | (16), (18), (24)               |
| <i>Mus musculus</i>            | Mm_CYB561A1     | CGCytb, CGCB, b561mouse                                           | Q60720       | (3), (24)                      |
|                                | Mm_CYB561A2     | Dcytb, DCytb, DCB, Cybrd1, Dcytbmouse                             | Q925G2       | (12), (20), (24)               |
|                                | Mm_CYB561A3     | LCytb, 'ubiquitous', LCB, b561mouse2                              | Q6P1H1       | (20), (24), (25)               |
|                                | Mm_CYB561D1     | Cyb561d1                                                          | NP_001074789 | (22)                           |
|                                | Mm_CYB561D2     | mouse 101F6, Cyb561d2, TSP10, TSCytb, TSCB, TSFmouse              | Q9WUJ3       | (1), (4), (24)                 |
| <i>Schistosoma japonicum</i>   | Sj_CYB561A1     | SjCytb561, b561Schisto                                            | Q5D8X4       | (6), (24)                      |
| <i>Zea mays</i>                | Zm_CYB561B1     | Zmb561, b561Z.mays                                                | Q61681       | (13), (24)                     |

The systematic name suggested for the CYB561 protein family members, is based on (i) the HUGO Gene Nomenclature Committee adopted name for the cytochrome *b* super family, 'CYB'; (ii) the cytochrome *b*561-specific extension: '561'; (iii) a letter (A-E) referring to the evolutionary clusters identified by Tsubaki *et al.* (24)\*, and (iv) a sequential number (1, 2, ...) for each CYB561 isoform within each species. Note that by lack of information on subcellular localization and physiological function for several CYB561 isoforms, identical numbers (e.g., Mm\_CYB561A1 and Sj\_CYB561A1) not necessarily mean identical functions or localizations across species. In this article, we refer to the proposed systematic name of the proteins, preceded, for clarity, by the common name that refers to the protein localization (*i.e.*, 'CG' for chromaffin granule; 'D' for duodenum; 'L' for lysosome; 'T' for tonoplast) or function (*i.e.*, 'TS' for tumor suppression).

\*Clusters D and E from [24] were exchanged to accommodate for already published names (CYB561D1 and CYB561D2).

## Supplementary References

1. Bérczi A, Desmet F, Van Doorslaer S, and Asard H. Spectral characterization of the recombinant mouse tumor suppressor 101F6 protein. *Eur Biophys J* 39: 1129–1142, 2010.
2. Bérczi A, Su D, and Asard H. An Arabidopsis cytochrome  $b_{561}$  with trans-membrane ferrireductase capability. *FEBS Lett* 581: 1505–1508, 2007.
3. Bérczi A, Su D, Lakshminarasimhan M, Vargas A, and Asard H. Heterologous expression and site-directed mutagenesis of an ascorbate-reducible cytochrome  $b_{561}$ . *Arch Biochem Biophys* 443: 82–92, 2005.
4. Bérczi A, Zimanyi L, and Asard H. Dihydrolipoic acid reduces cytochrome  $b_{561}$  proteins. *Eur Biophys J*, 2012. [Epub ahead of print]; DOI 10.1007/s00249-012-0812-x
5. Cenacchi L, Busch M, Schleidt PG, Muller FG, Stumpp TV, Mantele W, Trost P, and Lancaster CR. Heterologous production and characterisation of two distinct dihaem-containing membrane integral cytochrome  $b_{(561)}$  enzymes from *Arabidopsis thaliana* in *Pichia pastoris* and *Escherichia coli* cells. *Biochim Biophys Acta* 1818: 679–688, 2012.
6. Glanfield A, McManus DP, Smyth DJ, Lovas EM, Loukas A, Gobert GN, and Jones MK. A cytochrome  $b_{561}$  with ferric reductase activity from the parasitic blood fluke, *Schistosoma japonicum*. *PLoS Negl Trop Dis* 4: e884, 2010.
7. Griesen D, Su D, Bérczi A, and Asard H. Localization of an ascorbate-reducible cytochrome  $b_{561}$  in the plant tonoplast. *Plant Physiol* 134: 726–734, 2004.
8. Iliadi KG, Avivi A, Iliadi NN, Knight D, Korol AB, Nevo E, Taylor P, Moran MF, Kamyshev NG, and Boulianne GL. *nemy* encodes a cytochrome  $b_{561}$  that is required for *Drosophila* learning and memory. *Proc Natl Acad Sci U S A* 105: 19986–19991, 2008.
9. Liu W, Kamensky Y, Kakkar R, Foley E, Kulmacz RJ, and Palmer G. Purification and characterization of bovine adrenal cytochrome  $b_{561}$  expressed in insect and yeast cell systems. *Protein Expr Purif* 40: 429–439, 2005.
10. Liu W, da Silva GF, Wu G, Palmer G, Tsai AL, and Kulmacz RJ. Functional and structural roles of residues in the third extramembrane segment of adrenal cytochrome  $b_{561}$ . *Biochemistry* 50: 3149–3160, 2011.
11. Ludwiczek S, Rosell FI, Ludwiczek ML, and Mauk AG. Recombinant expression and initial characterization of the putative human enteric ferric reductase Dcytb. *Biochemistry* 47: 753–761, 2008.
12. McKie AT, Barrow D, Latunde-Dada GO, Rolfs A, Sager G, Mudaly E, Mudaly M, Richardson C, Barlow D, Bomford A, Peters TJ, Raja KB, Shirali S, Hediger MA, Farzaneh F, and Simpson RJ. An iron-regulated ferric reductase associated with the absorption of dietary iron. *Science* 291: 1755–1759, 2001.
13. Nakanishi N, Rahman MM, Sakamoto Y, Takigami T, Kobayashi K, Hori H, Hase T, Park SY, and Tsubaki M. Importance of the conserved lysine 83 residue of *Zea mays* cytochrome  $b_{(561)}$  for ascorbate-specific transmembrane electron transfer as revealed by site-directed mutagenesis studies. *Biochemistry* 48: 10665–10678, 2009.
14. Nanasato Y, Akashi K, and Yokota A. Co-expression of cytochrome  $b_{561}$  and ascorbate oxidase in leaves of wild watermelon under drought and high light conditions. *Plant Cell Physiol* 46: 1515–1524, 2005.
15. Oakhill JS, Marritt SJ, Garetta EG, Cammack R, and McKie AT. Functional characterization of human duodenal cytochrome b (Cybrd1): Redox properties in relation to iron and ascorbate metabolism. *Biochim Biophys Acta* 1777: 260–268, 2008.
16. Ohtani S, Iwamaru A, Deng W, Ueda K, Wu G, Jayachandran G, Kondo S, Atkinson EN, Minna JD, Roth JA, and Ji L. Tumor suppressor 101F6 and ascorbate synergistically and selectively inhibit non-small cell lung cancer growth by caspase-independent apoptosis and autophagy. *Cancer Res* 67: 6293–6303, 2007.
17. Preger V, Scagliarini S, Pupillo P, and Trost P. Identification of an ascorbate-dependent cytochrome  $b$  of the tonoplast membrane sharing biochemical features with members of the cytochrome  $b_{561}$  family. *Planta* 220: 365–375, 2005.
18. Recuenco MC, Fujito M, Rahman MM, Sakamoto Y, Takeuchi F, and Tsubaki M. Functional expression and characterization of human 101F6 protein, a homologue of cytochrome  $b_{561}$  and a candidate tumor suppressor gene product. *Biofactors* 34: 219–230, 2008.
19. Silsand T and Flatmark T. Purification of cytochrome  $b_{561}$ . An integral heme protein of the adrenal chromaffin granule membrane. *Biochim Biophys Acta* 359: 257–266, 1974.
20. Su D and Asard H. Three mammalian cytochromes  $b_{561}$  are ascorbate-dependent ferrireductases. *FEBS J* 273: 3722–3734, 2006.
21. Takeuchi F, Hori H, Obayashi E, Shiro Y, and Tsubaki M. Properties of two distinct heme centers of cytochrome  $b_{561}$  from bovine chromaffin vesicles studied by EPR, resonance Raman, and ascorbate reduction assay. *J Biochem* 135: 53–64, 2004.
22. The UniProt Consortium. Reorganizing the protein space at the Universal Protein Resource (UniProt). *Nucl Acid Res* 40: D71–D75, 2012.
23. Tsubaki M, Nakayama M, Okuyama E, Ichikawa Y, and Hori H. Existence of two heme B centers in cytochrome  $b_{561}$  from bovine adrenal chromaffin vesicles as revealed by a new purification procedure and EPR spectroscopy. *J Biol Chem* 272: 23206–23210, 1997.
24. Tsubaki M, Takeuchi F, and Nakanishi N. Cytochrome  $b_{561}$  protein family: expanding roles and versatile transmembrane electron transfer abilities as predicted by a new classification system and protein sequence motif analyses. *Biochim Biophys Acta* 1753: 174–190, 2005.
25. Zhang DL, Su D, Bérczi A, Vargas A, and Asard H. An ascorbate-reducible cytochrome  $b_{561}$  is localized in macrophage lysosomes. *Biochim Biophys Acta* 1760: 1903–1913, 2006.
